# Supplementary material for: Adsorption properties of pyramidal superatomic molecules based on the structural framework of the Au20 cluster
Source: Royal Society of Chemistry journal article supplement (doi:10.1039/d2cp01552h), 2022-01-01
Supplement: d2cp01552h1.pdf [file d2cp01552h1.pdf]

Electronic Supplementary Information (ESI)

## **Adsorption properties of pyramidal superatomic molecules based on the structure framework of Au<sub>20</sub> cluster**

Qiman Liu<sup>\*a, b</sup>, Manli Zhang<sup>a</sup>, Dawen Zhang<sup>a</sup>, Yunhu Hu<sup>a</sup>, Qiyong Zhu<sup>\*a</sup> and Longjiu Cheng<sup>\*b</sup>

<sup>a</sup>School of Chemistry and Materials Engineering, Huainan Normal University, Huainan 232038, P. R. China

<sup>b</sup>Key Laboratory of Structure and Functional Regulation of Hybrid Materials, Anhui University, Ministry of Education, Hefei 230601, P.R. China.

**\*Corresponding author.** E-mail: qimliu@ustc.edu.cn; clj@ustc.edu.cn; zhuqiyong2651@163.com

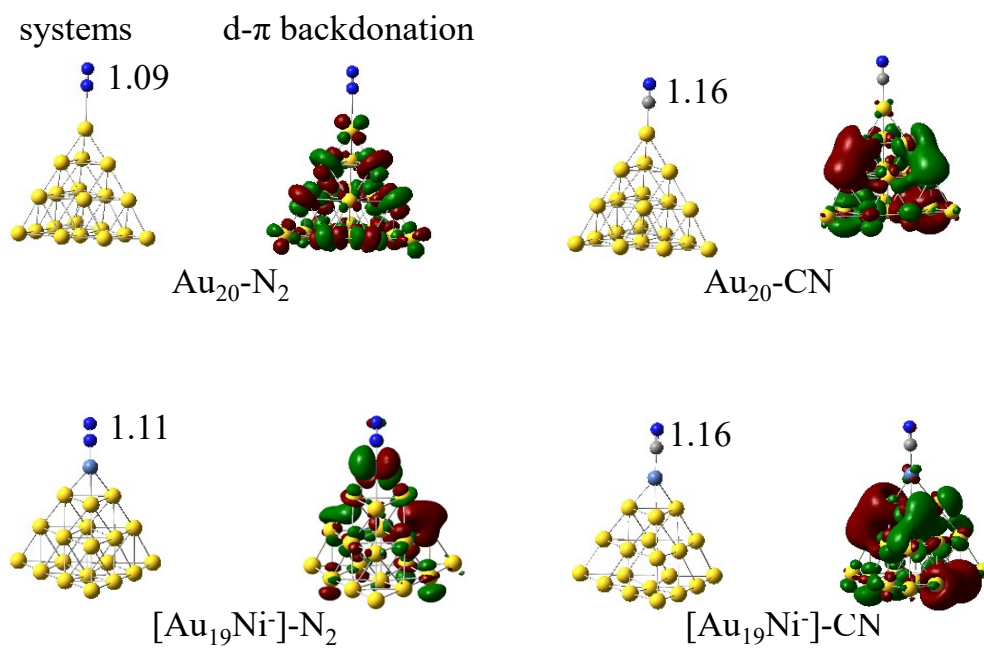

Fig. S1 The structures, bond lengths ( $\text{\AA}$ ) and the molecular orbitals of Au<sub>20</sub>-N<sub>2</sub>, [Au<sub>19</sub>Ni]-N<sub>2</sub>, Au<sub>20</sub>-CN, and [Au<sub>19</sub>Ni]-CN.

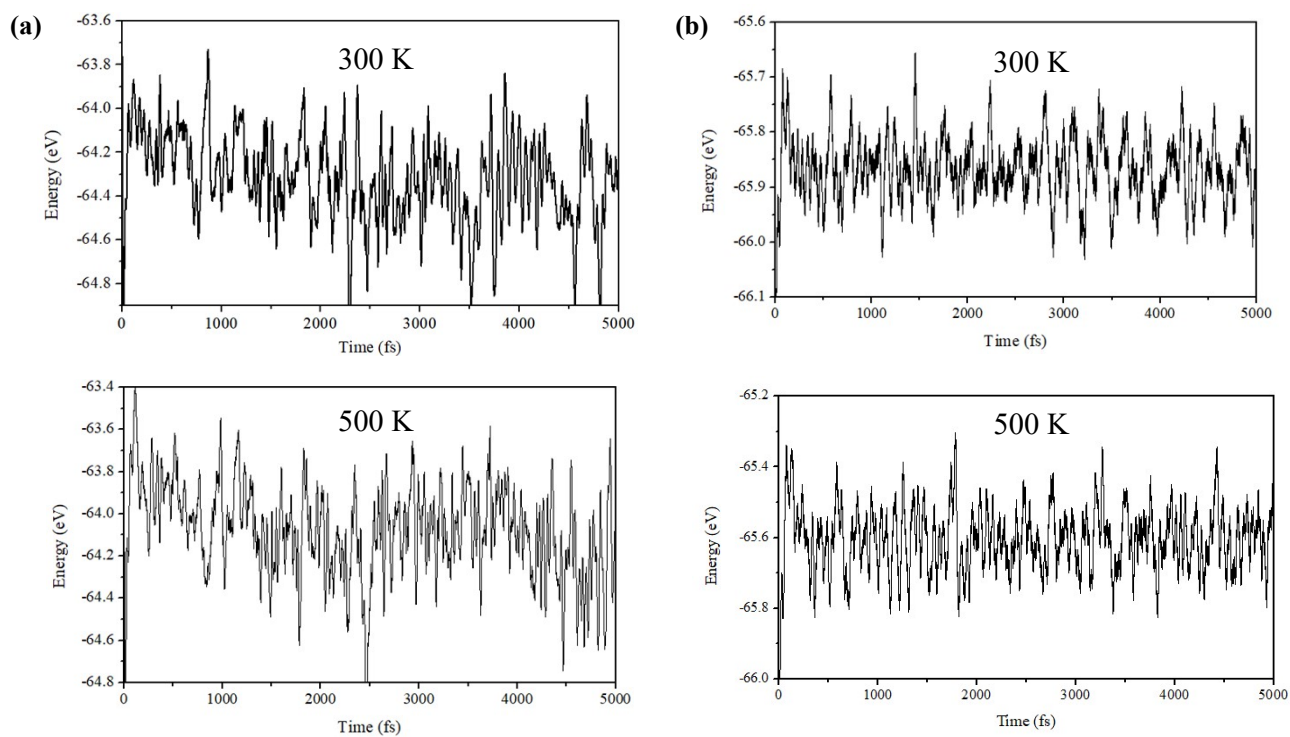

Fig. S2 Snapshots of the final frame of (a) Au<sub>19</sub>H-CO and (b) Au<sub>20</sub>-CO at the temperatures of 300 K and 500 K at the end of 10 ps AIMD simulations.

Table S1 NPA charge on the Au/Ni sites and the total charge on the adsorbed CO.

| Systems             | Charge on adsorption sites |                     | $\Delta Q$ | Charge on CO after adsorption |
|---------------------|----------------------------|---------------------|------------|-------------------------------|
|                     | Before CO adsorption       | After CO adsorption |            |                               |
| Au <sub>20</sub>    | 0.18                       | 0.16                | -0.02      | 0.13                          |
| Au <sub>19</sub> Ni | 0.04                       | -0.17               | -0.21      | 0.05                          |
